# Supplementary material for: Gut Microbiota Modulation by Dietary Barley Malt Melanoidins
Source: PubMed Central journal article supplement (PMC7019678; doi:10.3390/nu12010241), 2020-01-17
Supplement: nutrients-12-00241-s001.pdf [file nutrients-12-00241-s001.pdf]

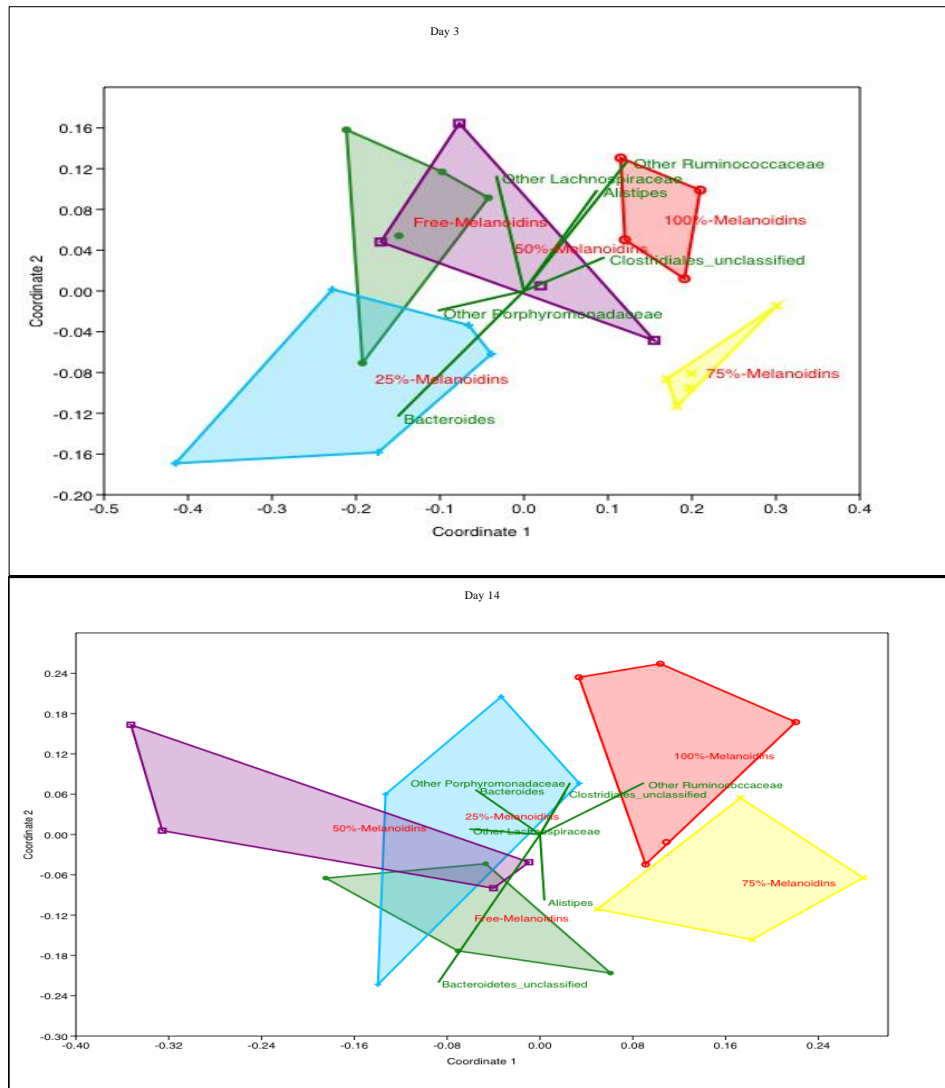

**Figure S1:** Impact of increasing dietary melanoidin malts on the composition of the gut microbiota (non-metric multidimensional scaling (NMS)) at Day 3 and 14.

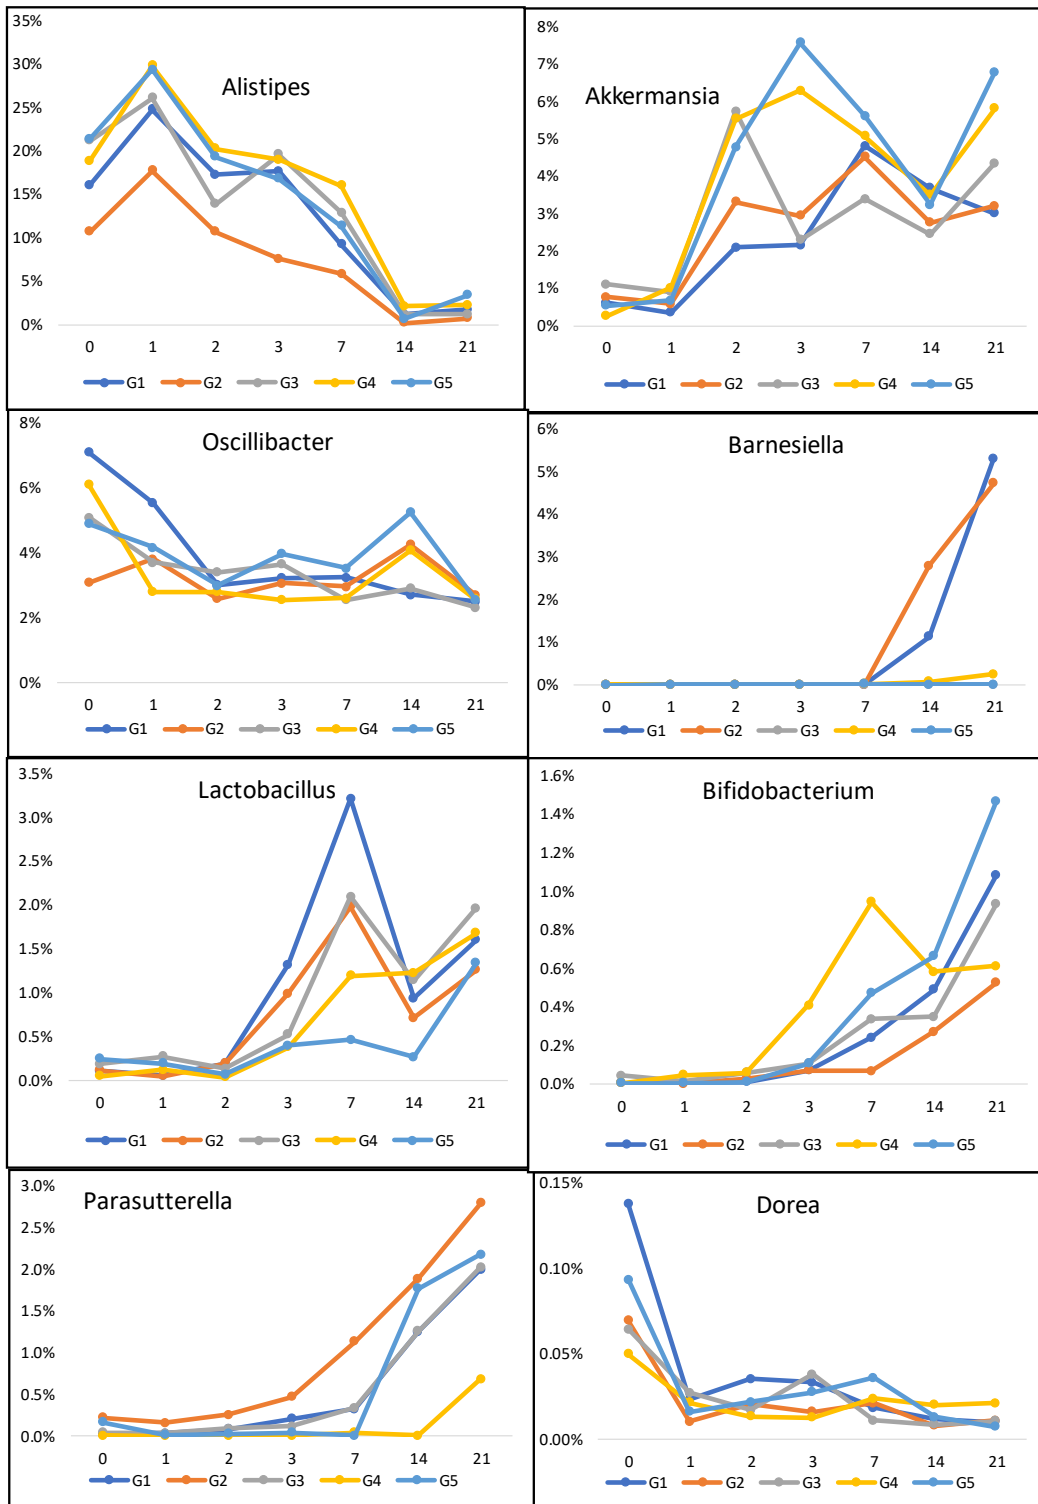

Figure S2: Temporal evolution of selected genera along the study and impact of malt consumption overall.

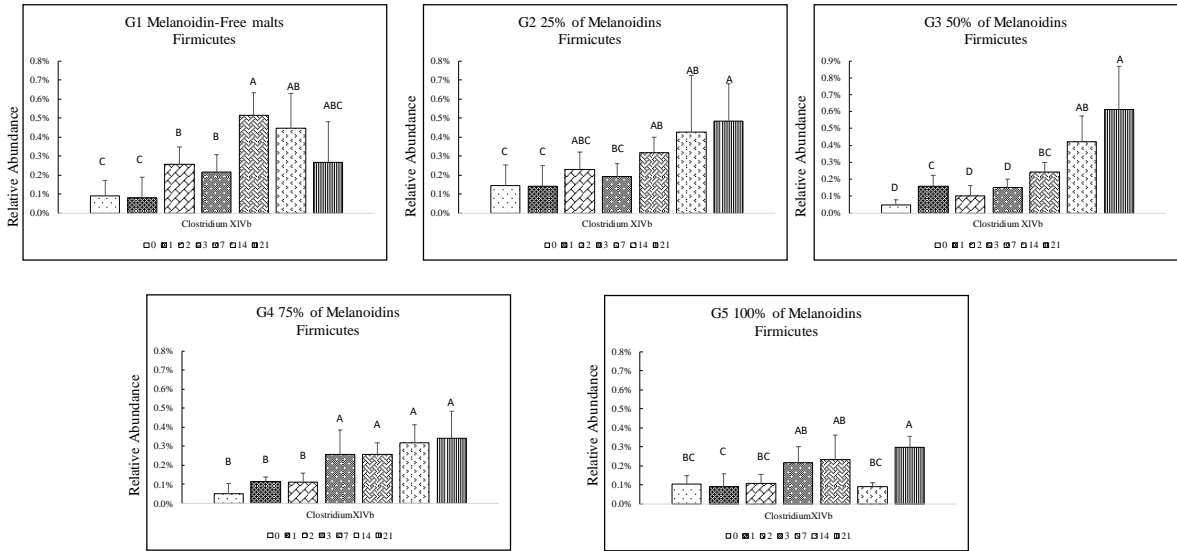

(A)

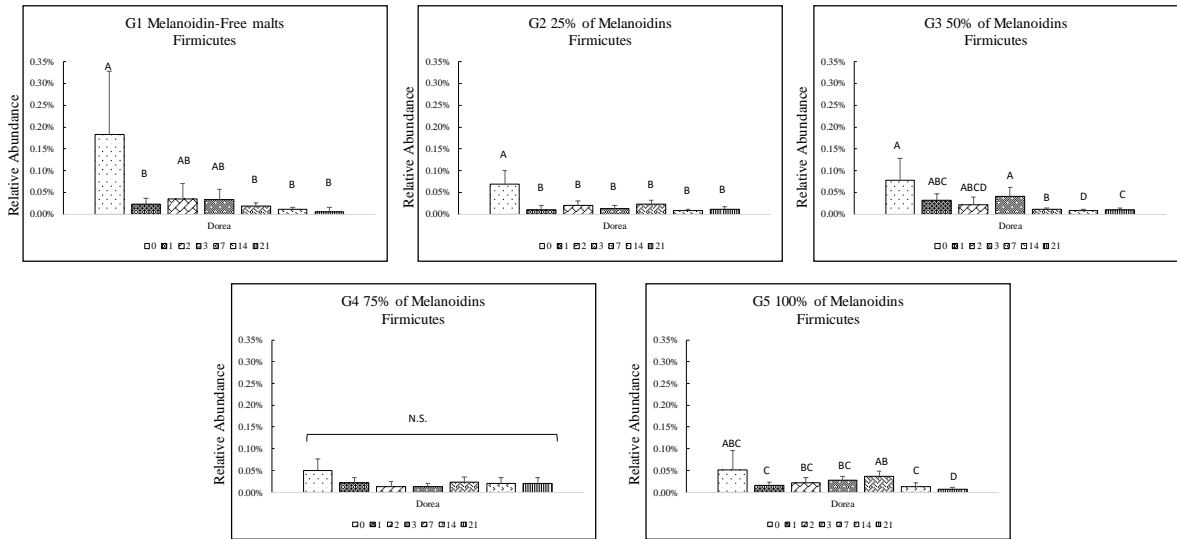

(B)

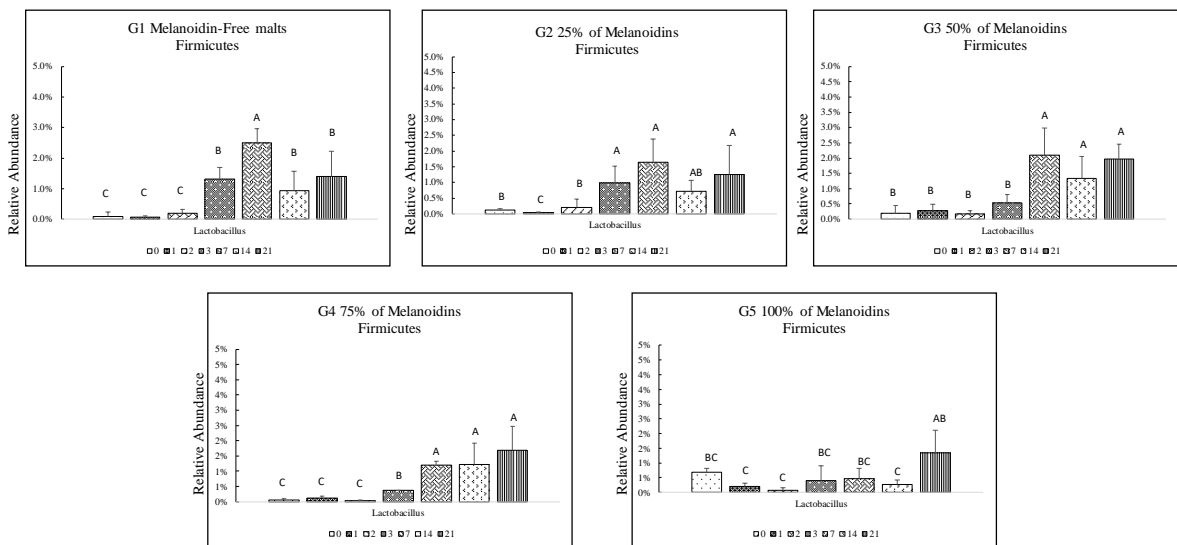

(C)

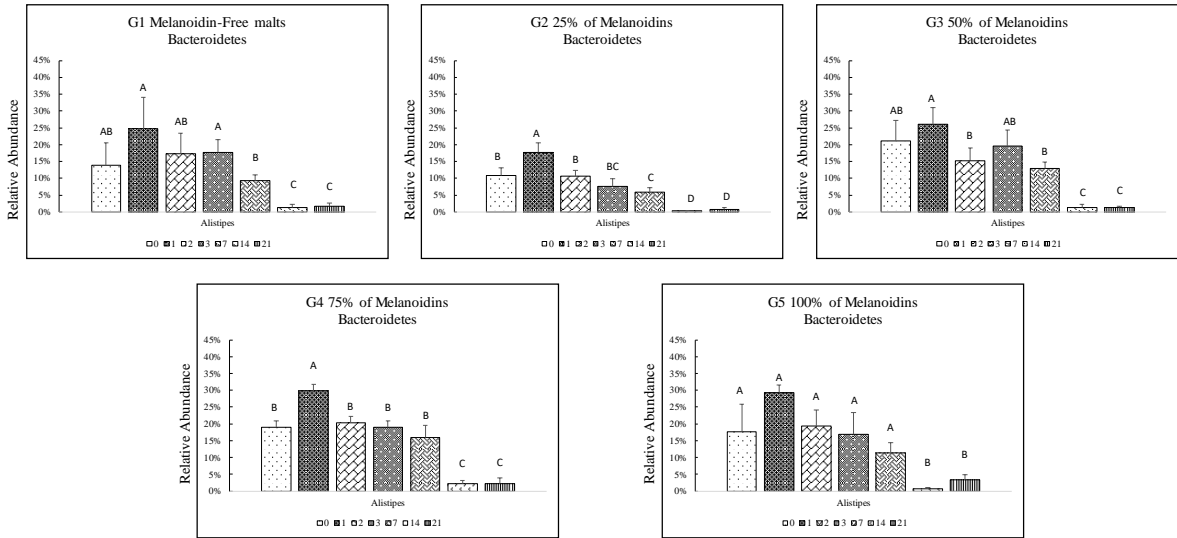

(D)

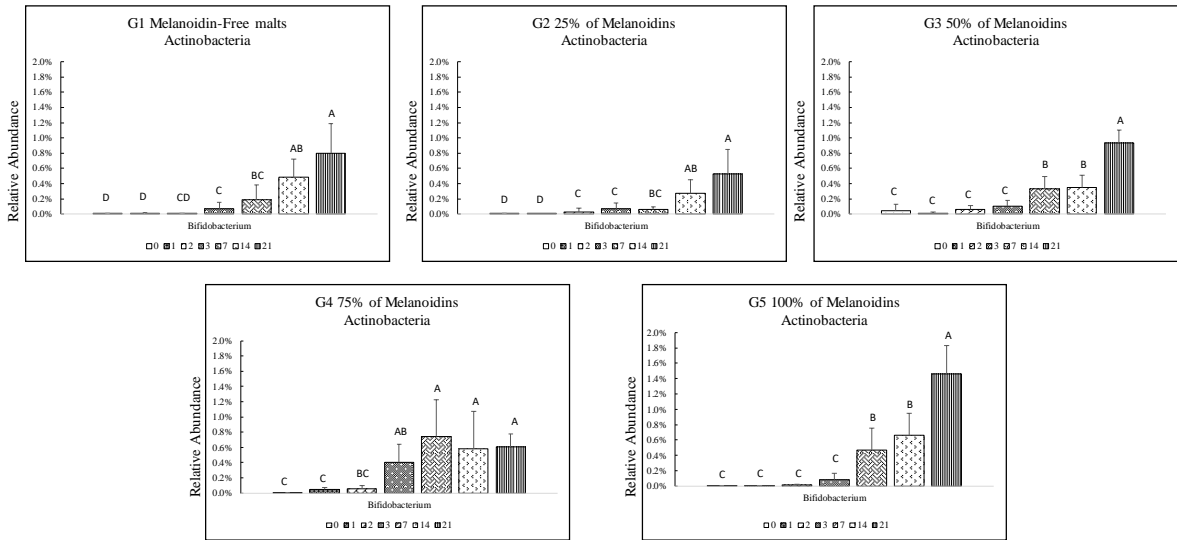

(E)

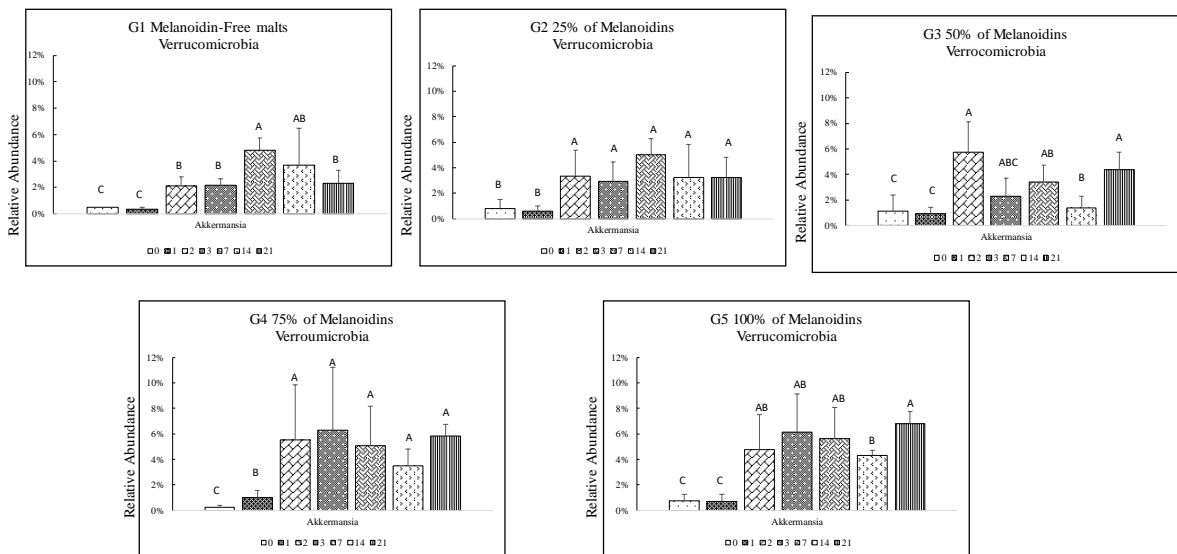

(F)

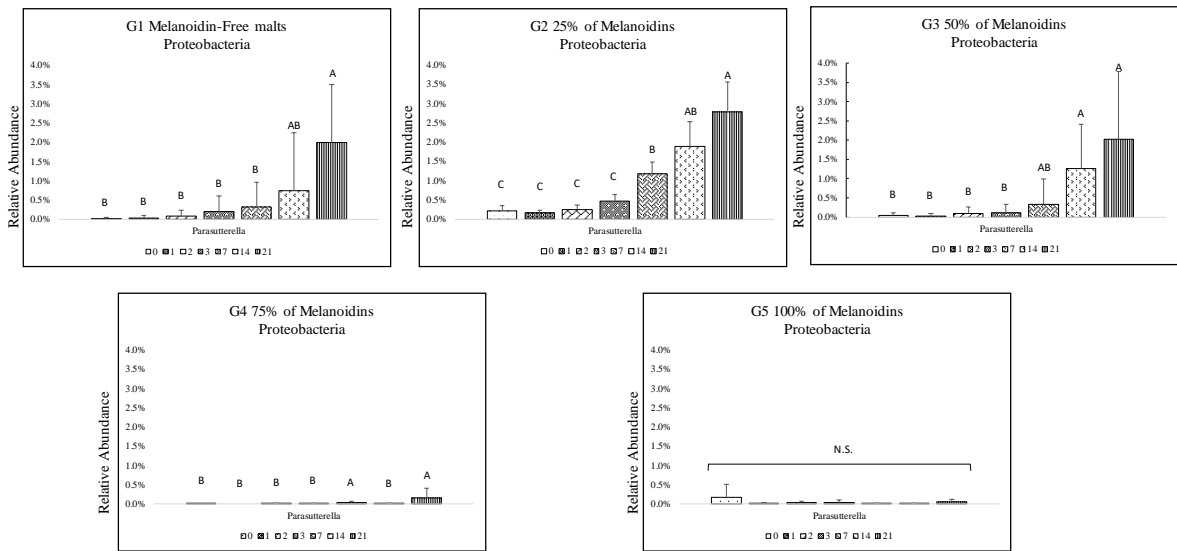

(G)

**Figure S3:** Impact of different portions of dietary melanoidin malts on responsive genera abundances among the other phyla. (A) Firmicutes (ClostridiumXIVb), (B) (Dorea), (C) (Latobacillus); Bacteroidetes (D) (Alistipes), (E) Actinobacteria (Bifidobacterium), (F) Verrumicrobia (Akkermansia); (G) Proteobacteria (Parasutterella). Significant differences ( $p < 0.005$ ) are indicated by different letters ( $n = 5$ ).
